# Supplementary material for: Facile one-step synthesis of a niobium iron oxide based electrochemical transistor for rapid, label-free detection of folic acid in human blood serum samples
Source: Royal Society of Chemistry journal article supplement (doi:10.1039/d3nj00475a), 2023-01-01
Supplement: d3nj00475a1.pdf [file d3nj00475a1.pdf]

## Supplementary Information

### Label-free rapid detection of Folic acid using a simple one-step synthesis of Niobium iron oxide-based electrochemical transistor

Anjali Sreekumar<sup>1</sup>, Lignesh Durai<sup>1</sup>, Sushmee Badhulika<sup>1\*</sup>

<sup>1</sup>*Department of Electrical Engineering, Indian Institute of Technology, Hyderabad  
502285, India.*

*\*Corresponding author: E-mail: sbadh@iith.ac.in; Telephone: +040-23016467*

#### S1. Effect of pH and scan rate

The pH of PBS used as an electrolyte has significant effect on the sensing performance of an electrochemical sensor, affecting its sensitivity, selectivity and stability. The impact of the electrolyte pH on the electro-oxidation of FA at different pH from pH 5.8–8.6 were investigated as shown in Fig. S1(a). At low pH values, the concentration of hydrogen ions in the solution increases, which can lead to reduction in the sensitivity and stability of the sensor. In contrast, high pH values can result in increased oxidation potential, which can negatively affect the selectivity and sensitivity of a sensor. Additionally, pH can affect the surface charge of the electrode and binding affinity of analyte, which can impact the overall performance of sensor [1]. The scan rate is an important parameter in electrochemical sensing which depends on the various factors such as reaction rate, diffusion coefficient, and mass transport. Fig S1(b) depicts the CV analysis of NbFeO<sub>4</sub> modified sensor with different scan rates. A higher scan rate leads to a faster response time, but can also result in lower sensitivity and resolution due to reduced diffusion of analyte at the surface of electrode. On the other hand, a lower scan rate provides better sensitivity and resolution, but can also result in longer measurement times and increased

susceptibility to interference. Therefore, selecting an appropriate scan rate is crucial in achieving optimal performance in electrochemical sensing [2].

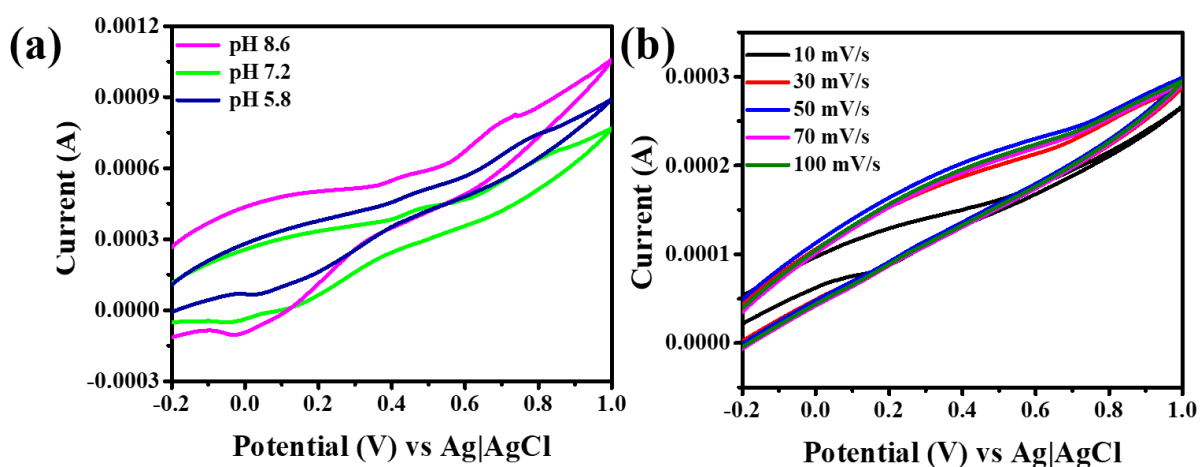

**Fig S1 (a) CV analysis of NbFeO<sub>4</sub> modified sensor in the presence of FA in PBS of different pH (b) CV analysis of NbFeO<sub>4</sub> modified sensor in different scan rates**

**Table S1. Determination of FA in simulated blood serum using as-fabricated NbFeO<sub>4</sub> based sensor under the standard addition method**

| Sample | FA concentration nM | FA spiked nM | FA recovered | Recovery Percentages | Relative standard Deviation |
|--------|---------------------|--------------|--------------|----------------------|-----------------------------|
| SBS    | 0.2                 | 0.2          | 0.19         | 95                   | 5                           |
|        | 0.4                 | 0.2          | 0.39         | 97.5                 | 2.5                         |
|        | 0.6                 | 0.2          | 0.70         | 116                  | 16                          |
|        | 0.8                 | 0.2          | 0.96         | 121.4                | 20.2                        |
|        | 1                   | 0.2          | 1.20         | 120                  | 20                          |

## References

1. Sohn, I.Y., Kim, D.J., Jung, J.H., Yoon, O.J., Thanh, T.N., Quang, T.T. and Lee, N.E., 2013. pH sensing characteristics and biosensing application of solution-gated reduced graphene oxide field-effect transistors. *Biosensors and Bioelectronics*, 45, pp.70-76.
2. Heien, M.L., Phillips, P.E., Stuber, G.D., Seipel, A.T. and Wightman, R.M., 2003. Overoxidation of carbon-fiber microelectrodes enhances dopamine adsorption and increases sensitivity. *Analyst*, 128(12), pp.1413-1419.
